# Supplementary material for: Ultrasmall superparamagnetic iron oxide nanoparticles for enhanced tumor penetration
Source: J Mater Chem B. 2023 Mar 3;11(15):3422–33. doi: 10.1039/d2tb02630a (PMC10091360; doi:10.1039/d2tb02630a)
Supplement: TB-011-D2TB02630A-s001 [file TB-011-D2TB02630A-s001.pdf]

## Supporting information

### Ultrasmall superparamagnetic iron oxide nanoparticles for enhanced tumor penetration

Xue Feng,<sup>a</sup> Yuxiang Xue,<sup>a</sup> Sevil Gonca,<sup>a</sup> Kunlang Ji,<sup>b</sup> Mei Zhang,<sup>a</sup> Francisco R. García-García,<sup>c</sup> Quan Li,<sup>d</sup> Yi Huang,<sup>c</sup> Konstantin V. Kamenev,<sup>c,e</sup> and Xianfeng Chen<sup>\*a</sup>

\*Corresponding authors

<sup>a</sup> School of Engineering, Institute for Bioengineering, University of Edinburgh, The King's Buildings, Edinburgh EH9 3JL (UK)

Email: Michael.Chen@ed.ac.uk

<sup>b</sup> School of Chemistry, Centre for Science at Extreme Conditions, University of Edinburgh, The King's Buildings, Edinburgh EH9 3FD (UK)

<sup>c</sup> School of Engineering, Institute for Materials and Processes, University of Edinburgh, The King's Buildings, Edinburgh EH9 3JL (UK)

<sup>d</sup> School of Engineering, Institute for Energy Systems, University of Edinburgh, The King's Buildings, Edinburgh EH9 3JL (UK)

<sup>e</sup> School of Engineering, Centre for Science at Extreme Conditions, University of Edinburgh, The King's Buildings, Edinburgh EH9 3FD (UK)

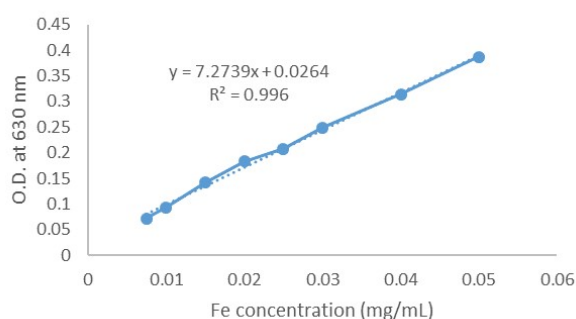

**Figure S1.** Standard curve of iron in 6M HCL via Prussian blue reaction.

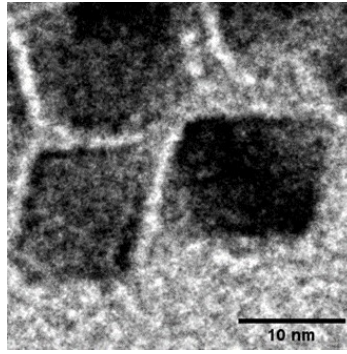

**Figure S2.** TEM image of typical octahedral 15 nm  $\text{Fe}_3\text{O}_4$ -OA nanoparticles. Scale bar, 10 nm.

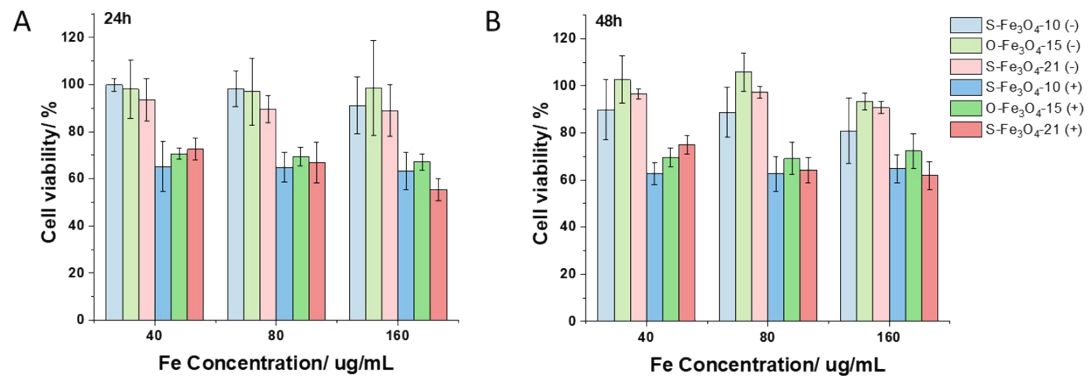

**Figure S3.** The cell viability of MCF-7 monolayer cells after treatment with different types of  $\text{Fe}_3\text{O}_4$  nanoparticles at (A) 24 h and (B) 48 h. (Mean values  $\pm$  standard deviation,  $n=5$ ).

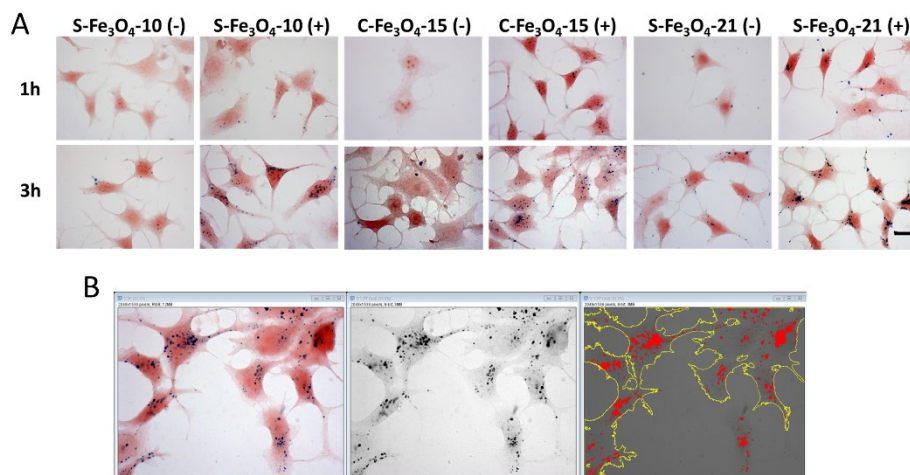

**Figure S4.** (A) Distribution of different types of nanoparticles in MCF-7 cells for incubation times of 1 h and 3 h. The cells were observed by an objective lens of 63X. Scale bar, 30  $\mu\text{m}$ . (B) Pictures illustrated the process of calculating the relative area of the  $\text{Fe}_3\text{O}_4$  nanoparticles to cells in ImageJ. The yellow lines indicate the cellular areas and the red dots indicate the accumulation of  $\text{Fe}_3\text{O}_4$  nanoparticles.

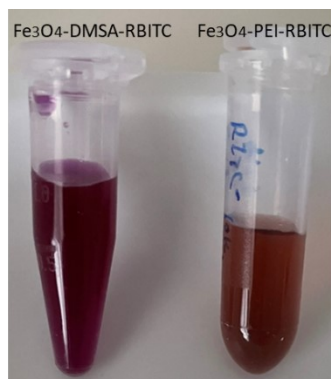

**Figure S5.** Picture displaying the  $\text{Fe}_3\text{O}_4$ -DMSA nanoparticles possessing higher dye loading efficiency than  $\text{Fe}_3\text{O}_4$ -PEI nanoparticles, showing deeper purple colour when the iron concentrations of the two types of nanoparticles are the same.

**Table S1.** Characterization of six types of  $\text{Fe}_3\text{O}_4$  nanoparticles with different sizes, shapes and surface charges.

| Sample name                        | Dynamic light scattering        |                                     | Zeta potential (mV)<br>(n=3) |
|------------------------------------|---------------------------------|-------------------------------------|------------------------------|
|                                    | Size (Number mean, nm)<br>(n=3) | Polydispersity index (PDI)<br>(n=3) |                              |
| S- $\text{Fe}_3\text{O}_4$ -10 (-) | 12.9 ± 2.6                      | 0.321 ± 0.02                        | -49 ± 2.3                    |
| O- $\text{Fe}_3\text{O}_4$ -15 (-) | 14.4 ± 0.2                      | 0.42 ± 0.01                         | -30.8 ± 2.3                  |
| S- $\text{Fe}_3\text{O}_4$ -21 (-) | 23 ± 5.2                        | 0.487 ± 0.007                       | -37 ± 1.4                    |
| S- $\text{Fe}_3\text{O}_4$ -10 (+) | 59.5 ± 1.7                      | 0.209 ± 0.01                        | 34.8 ± 0.6                   |
| O- $\text{Fe}_3\text{O}_4$ -15 (+) | 122 ± 14.8                      | 0.179 ± 0.02                        | 22.7 ± 2.6                   |
| S- $\text{Fe}_3\text{O}_4$ -21 (+) | 306.8 ± 8.1                     | 0.594 ± 0.02                        | 30.5 ± 0.2                   |
